# Supplementary material for: Elevational divergence in the great tit complex revealed by major hemoglobin genes
Source: PubMed Central journal article supplement — Curr Zool. 2017 Jul 6;64(4):455–64. doi: 10.1093/cz/zox042 (PMC6084574; doi:10.1093/cz/zox042), 2017-07-06
Supplement: zox042_supplementary_material.pdf [file zox042_supplementary_material.pdf]

---

## Supplementary Material

# Elevational divergence in the great tit complex revealed by major hemoglobin genes

Xiaojia Zhu, Yuyan Guan, Gang Song, Yanhua Qu, Gabriel David and Fumin Lei

**Figure S1** The posterior distributions of migration rates estimated by the coalescent isolation-with-migration model in IMA. The generally restrained gene flow in  $\alpha^A$ -globin gene and upslope gene flow between HA and LA populations that is reversed to the downslope of reference loci are obviously exhibited (Figure 1).

**Figure S2** Sampling design for Clinefit analyses in T1 and T2 parallel transects. (a) Locations of sampling sites along elevational transects; (b) Elevation profiles of sampling sites along each transect. The approximated ridge lines of transects contoured by straight lines between adjacent localities in Google Earth, the shadows represent for respective elevational gradients.

**Figure S3** Allele frequencies of each amino acid substitutions of high-altitude alleles in global samples. (a) High-altitude replaced alleles in  $\alpha^A$ -globin gene; (b) Flexible alleles of  $\alpha^A$ -globin gene and  $\beta^A$ -globin gene.

**Table S1** Specimen information and collection localities of the Great Tit complex.

**Table S2** Primers used in PCR of all genes in this study.

**Table S3** Multi-locus summary statistics in nucleotide polymorphisms of the *P. minor* populations.

**Table S4** Heterozygosity and genotype frequencies in  $\alpha^A$ - and  $\beta^A$ -globin subunit of the *P. minor* by Hardy-Weinberg equilibrium test.

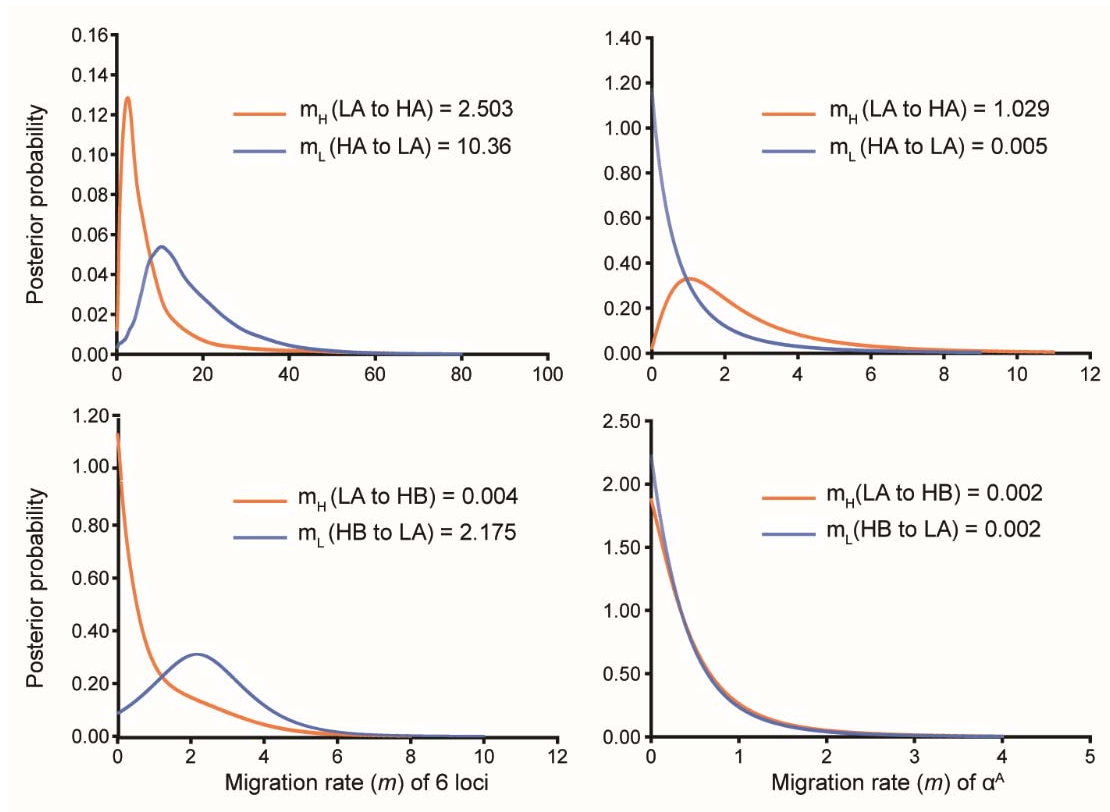

**Figure S1** The posterior distributions of migration rates estimated by the coalescent isolation-with-migration model in IMa. The generally restrained gene flow in  $\alpha^A$ -globin gene and upslope gene flow between HA and LA populations that is reversed to the downslope of reference loci are obviously exhibited (Figure 1).

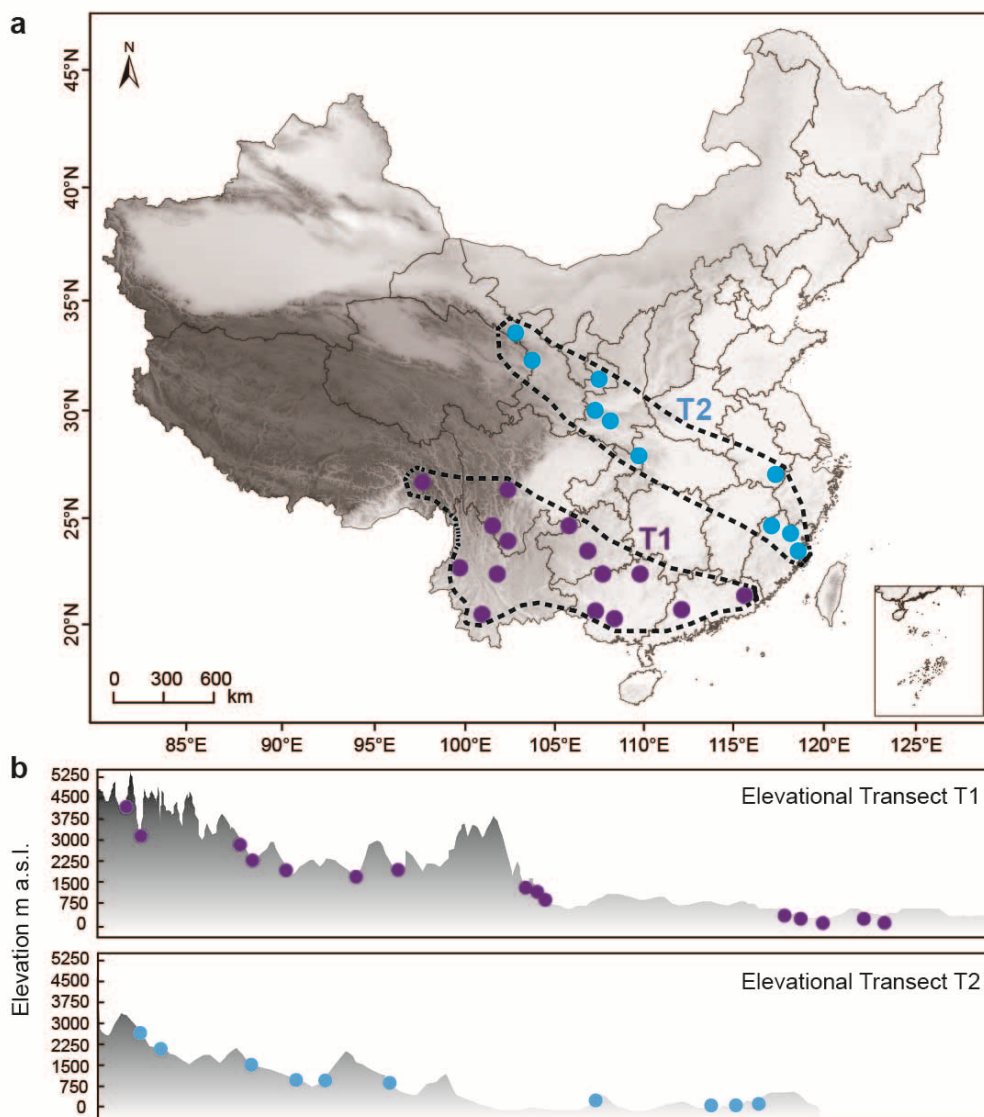

**Figure S2** Sampling design for Clinefit analyses in T1 and T2 parallel transects. **(a)** Locations of sampling sites along elevational transects; **(b)** Elevation profiles of sampling sites along each transect. The approximated ridge lines of transects contoured by straight lines between adjacent localities in Google Earth, the shadows represent for respective elevational gradients.

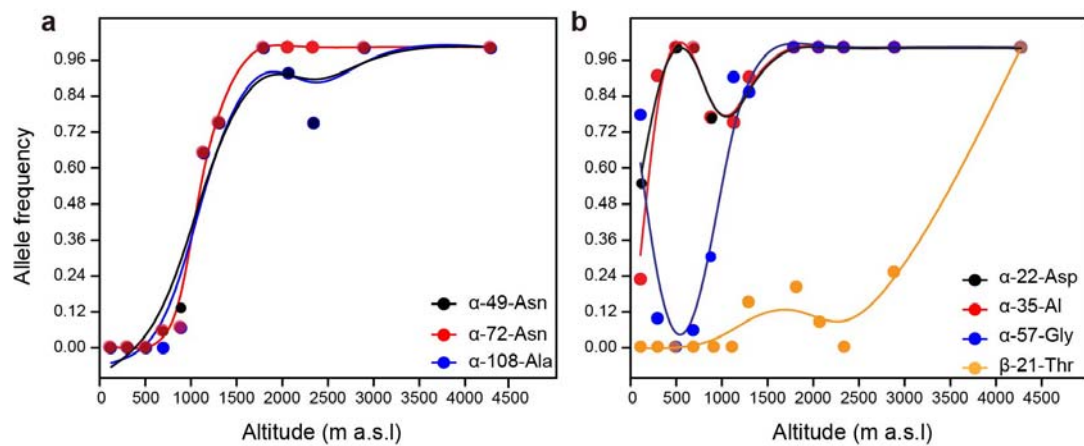

**Figure S3** Allele frequencies of each amino acid substitutions of high-altitude alleles in samples of all clades (Figure 1). (a) High-altitude replaced alleles in  $\alpha^4$ -globin gene; (b) Flexible alleles of  $\alpha^4$ -globin gene and  $\beta^4$ -globin gene.

**Table S1** Specimen information and collection localities of the Great Tit complex.

| <b>Species</b>     | <b>Locality</b>              | <b>Elevation/m</b> | <b>Sample size</b> | <b>Clades</b> | <b>Type</b>  | <b>Source</b> | <b>Dataset</b> |
|--------------------|------------------------------|--------------------|--------------------|---------------|--------------|---------------|----------------|
| <i>Parus minor</i> | Jixi, Anhui, China           | 167                | 6                  | A             | muscle/blood | IOZ           | LA             |
| <i>Parus minor</i> | Minhou, Fujian, China        | 19                 | 1                  | A             | muscle/blood | IOZ           | LA             |
| <i>Parus minor</i> | Fuzhou, Fujian, China        | 70                 | 2                  | A             | muscle/blood | IOZ           | LA             |
| <i>Parus minor</i> | Wuyi mountain, Fujian, China | 153                | 2                  | A             | muscle/blood | IOZ           | LA             |
| <i>Parus minor</i> | Zhaoqing, Guangdong, China   | 7                  | 3                  | A             | muscle/blood | IOZ           | LA             |
| <i>Parus minor</i> | Chaoan, Guangdong, China     | 11                 | 1                  | A             | muscle/blood | IOZ           | LA             |
| <i>Parus minor</i> | Guilin, Guangxi, China       | 169                | 3                  | A             | muscle/blood | IOZ           | LA             |
| <i>Parus minor</i> | Nan'ning, Guangxi, China     | 117                | 1                  | A             | muscle/blood | IOZ           | LA             |
| <i>Parus minor</i> | Fusui, Guangxi, China        | 97                 | 3                  | A             | muscle/blood | IOZ           | LA             |
| <i>Parus minor</i> | Lingui, Guangxi, China       | 210                | 1                  | A             | muscle/blood | IOZ           | LA             |
| <i>Parus minor</i> | Su'nan, Gansu, China         | 2309               | 8                  | A             | muscle/blood | IOZ           | HA             |
| <i>Parus minor</i> | Yongdeng, Gansu, China       | 2057               | 6                  | A             | muscle/blood | IOZ           | HA             |
| <i>Parus minor</i> | Longdong, Gansu, China       | 1339               | 2                  | A             | muscle/blood | IOZ           | HA             |
| <i>Parus minor</i> | Ningshan, Shaanxi, China     | 1380               | 1                  | A             | muscle/blood | IOZ           | HA             |
| <i>Parus minor</i> | Foping, Shaanxi, China       | 1150               | 2                  | A             | muscle/blood | IOZ           | HA             |
| <i>Parus minor</i> | San'guanmiao, Shaanxi, China | 1540               | 1                  | A             | muscle/blood | IOZ           | HA             |

| <b>Species</b>     | <b>Locality</b>               | <b>Elevation/m</b> | <b>Sample size</b> | <b>Clades</b> | <b>Type</b>  | <b>Source</b> | <b>Dataset</b>   |
|--------------------|-------------------------------|--------------------|--------------------|---------------|--------------|---------------|------------------|
| <i>Parus minor</i> | Bomi, Xizang, China           | 2828               | 1                  | B             | muscle/blood | IOZ           | HB               |
| <i>Parus minor</i> | Mangkang, Xizang, China       | 4282               | 1                  | B             | muscle/blood | IOZ           | HB               |
| <i>Parus minor</i> | Miyi, Sichuan, China          | 1355               | 1                  | B             | muscle/blood | IOZ           | HB               |
| <i>Parus minor</i> | Luding, Sichuan, China        | 1260               | 2                  | B             | muscle/blood | IOZ           | HB               |
| <i>Parus minor</i> | Luding, Sichuan, China        | 1653               | 1                  | B             | muscle/blood | IOZ           | HB               |
| <i>Parus minor</i> | Yanbian, Sichuan, China       | 2200               | 1                  | B             | muscle/blood | IOZ           | HB               |
| <i>Parus minor</i> | Panzhihua, Sichuan, China     | 1900               | 2                  | B             | muscle/blood | IOZ           | HB               |
| <i>Parus minor</i> | Xishuangbanna , Yunnan, China | 1211               | 1                  | B             | muscle/blood | IOZ           | HB               |
| <i>Parus minor</i> | Chuxiong , Yunnan, China      | 1872               | 1                  | B             | muscle/blood | IOZ           | HB               |
| <i>Parus minor</i> | Lijiang , Yunnan, China       | 2916               | 4                  | B             | muscle/blood | IOZ           | HB               |
| <i>Parus minor</i> | Lijiang , Yunnan, China       | 1305               | 2                  | B             | muscle/blood | IOZ           | HB               |
| <i>Parus minor</i> | Lijiang , Yunnan, China       | 2410               | 2                  | B             | muscle/blood | IOZ           | HB               |
| <i>Parus minor</i> | Gaoligong , Yunnan, China     | 2406               | 2                  | B             | muscle/blood | IOZ           | HB               |
| <i>Parus minor</i> | Gaoligong, Yunnan, China      | 2031               | 2                  | B             | muscle/blood | IOZ           | HB               |
| <i>Parus minor</i> | Lijiang , Yunnan, China       | 1305               | 1                  | B             | muscle/blood | IOZ           | Network          |
| <i>Parus minor</i> | Chishui, Guizhou, China       | 947                | 2                  | A-B           | muscle/blood | IOZ           | Network/ClineFit |
| <i>Parus minor</i> | Guiding, Guizhou, China       | 1118               | 6                  | A-B           | muscle/blood | IOZ           | Network/ClineFit |

| <b>Species</b>     | <b>Locality</b>               | <b>Elevation/m</b> | <b>Sample size</b> | <b>Clades</b> | <b>Type</b>  | <b>Source</b> | <b>Dataset</b>   |
|--------------------|-------------------------------|--------------------|--------------------|---------------|--------------|---------------|------------------|
| <i>Parus minor</i> | Libo, Guizhou, China          | 820                | 3                  | A-B           | muscle/blood | IOZ           | Network/ClineFit |
| <i>Parus minor</i> | Shennongjia, Hubei, China     | 870                | 2                  | A             | muscle/blood | IOZ           | Network/ClineFit |
| <i>Parus minor</i> | Shangzhi, Heilongjiang, China | 380                | 6                  | A             | muscle/blood | IOZ           | Network          |
| <i>Parus minor</i> | Baishan, Jilin, China         | 808                | 1                  | A             | muscle/blood | IOZ           | Network          |
| <i>Parus minor</i> | Zuojia, Jilin, China          | 200                | 4                  | A             | muscle/blood | IOZ           | Network          |
| <i>Parus minor</i> | Langxi, Anhui, China          | 13                 | 1                  | A             | muscle/blood | IOZ           | Network          |
| <i>Parus minor</i> | Jixi, Anhui, China            | 167                | 1                  | A             | muscle/blood | IOZ           | Network          |
| <i>Parus minor</i> | Qingyang, Gansu, China        | 1036               | 1                  | A             | muscle/blood | IOZ           | Network          |
| <i>Parus minor</i> | Foping, Shaanxi, China        | 1000               | 2                  | A             | muscle/blood | IOZ           | Network          |
| <i>Parus minor</i> | Ningshan, Shaanxi, China      | 1000               | 2                  | A             | muscle/blood | IOZ           | Network          |
| <i>Parus minor</i> | Ningqiang, Shaanxi, China     | 1050               | 1                  | A             | muscle/blood | IOZ           | Network          |
| <i>Parus minor</i> | Jiedong, Guangdong, China     | 11                 | 1                  | A             | muscle/blood | IOZ           | Network          |
| <i>Parus minor</i> | Guilin, Guangxi, China        | 169                | 1                  | A             | muscle/blood | IOZ           | Network          |
| <i>Parus major</i> | Yili, Xinjiang, China         | 589                | 2                  | D-E           | muscle/blood | IOZ           | Network          |
| <i>Parus major</i> | Fuhai, Xinjiang, China        | 498                | 2                  | D-E           | muscle/blood | IOZ           | Network          |
| <i>Parus major</i> | Buerjin, Xinjiang, China      | 664                | 5                  | D-E           | muscle/blood | IOZ           | Network          |
| <i>Parus major</i> | Wulumuqi, Xinjiang, China     | 838                | 2                  | D-E           | muscle/blood | IOZ           | Network          |

| <b>Species</b>     | <b>Locality</b>                                   | <b>Elevation/m</b> | <b>Sample size</b> | <b>Clades</b> | <b>Type</b>  | <b>Source</b> | <b>Dataset</b> |
|--------------------|---------------------------------------------------|--------------------|--------------------|---------------|--------------|---------------|----------------|
| <i>Parus major</i> | E'ergu'na, Inner Mongolia, China                  | 680                | 8                  | D             | muscle/blood | IOZ           | Network        |
| <i>Parus major</i> | Teshig, Mongolia                                  | 955                | 5                  | D             | muscle/blood | IOZ           | Network        |
| <i>Parus major</i> | Teshig, Mongolia                                  | 756                | 4                  | D             | muscle/blood | IOZ           | Network        |
| <i>Parus major</i> | Zvolen, Slovakia                                  | 284                | 8                  | D             | muscle/blood | IOZ           | Network        |
| <i>Parus major</i> | Cherga, Altai Region, Russia                      | 457                | 3                  | D             | muscle/blood | IOZ           | Network        |
| <i>Parus major</i> | Kamlak village, Altai Region, Russia              | 279                | 6                  | D             | muscle/blood | IOZ           | Network        |
| <i>Parus major</i> | Bialowieza nat. park, Poland                      | 159                | 2                  | D             | muscle/blood | IOZ           | Network        |
| <i>Parus major</i> | Sjællandssodde, Denmark                           | 15                 | 1                  | D             | muscle/blood | IOZ           | Network        |
| <i>Parus major</i> | Sønderborg, Denmark                               | 23                 | 1                  | D             | muscle/blood | IOZ           | Network        |
| <i>Parus major</i> | Lesbos, Greece                                    | 158                | 1                  | D             | muscle/blood | IOZ           | Network        |
| <i>Parus major</i> | Tajikistan                                        | 1911               | 1                  | E             | muscle/blood | IOZ           | Network        |
| <i>Parus major</i> | Condard village, Varzob region, Tajikistan        | 1195               | 2                  | E             | muscle/blood | IOZ           | Network        |
| <i>Parus major</i> | Khodzhaobigarm village, Varzob region, Tajikistan | 2066               | 3                  | E             | muscle/blood | IOZ           | Network        |



---

| <b>Species</b>        | <b>Locality</b>                                 | <b>Elevation/m</b> | <b>Sample size</b> | <b>Clades</b> | <b>Type</b>  | <b>Source</b> | <b>Dataset</b> |
|-----------------------|-------------------------------------------------|--------------------|--------------------|---------------|--------------|---------------|----------------|
| <i>Parus major</i>    | Sebiston village, Dangara region,<br>Tajikistan | 1345               | 1                  | E             | muscle/blood | IOZ           | Network        |
| <i>Parus cinereus</i> | Mysore, India                                   | 749                | 1                  | C             | muscle/blood | IOZ           | Network        |

Table S2 Primers and submissions of all genes in this study.

| Locus                        | Primer name | Sequence (5'-3')              | Annealing temp/°C | GeneBank Accession  | Reference of primers   |
|------------------------------|-------------|-------------------------------|-------------------|---------------------|------------------------|
| Unlinked mitochondrial loci  |             |                               |                   |                     |                        |
| <b>CR</b>                    | H636        | GAGATGAGGAGTATTCAACCGAC       | 53                | (Zhao et al. 2012)  | (Kvist et al. 2003)    |
|                              | L16700      | ATCATAAATTCTCGCCGGGACTCT      |                   |                     |                        |
| <b>ND2</b>                   | H6313       | CTCTTATTTAAGGCTTTGAAGGC       | 53                | MF322444 ~ MF322446 | (Sorenson et al. 1999) |
|                              | L5219       | CCCATACCCCGAAAATGATG          |                   |                     |                        |
| Unlinked autosomal loci      |             |                               |                   |                     |                        |
| <b>Fib</b>                   | Fib5        | CGCCATACAGAGTATACTGTGACAT     | 54                | MF322459 ~ MF322504 | (Kimball et al. 2009)  |
|                              | Fib6        | GCCATCCTGGCGATTCTGAA          |                   |                     |                        |
| <b>TGFB2</b>                 | TGFB2.5F    | GAAGCGTGCTCTAGATGCTG          | 58                | MF322447 ~ MF322458 | (Kimball et al. 2009)  |
|                              | TGFB2.6R    | AGGCAGCAATTATCCTGCAC          |                   |                     |                        |
| <b>Myo</b>                   | Myo2        | GCCACCAAGCACAAGATCCC          | 52                | MF322320 ~ MF322443 | (Kimball et al. 2009)  |
|                              | Myo3F       | TTCAGCAAGGACCTTGATAATGACTT    |                   |                     |                        |
| <b>ODC</b>                   | OD6         | GACTCCAAAGCAGTTTGTCTCAGTGT    | 56                | MF322196 ~ MF322319 | (Friesen et al. 1999)  |
|                              | OD8R        | ATTGGTGGTGGCTTCCCTGGCTCTGAAGA |                   |                     |                        |
| Haemoglobin genes            |             |                               |                   |                     |                        |
| <b><math>\alpha^4</math></b> | A11F        | AGGTGACATCATGGTGCTGTC         | 56                | MF321902 ~ MF322069 | This study             |
|                              | A668R       | TAACGGTACTTGGCAGTCAG          |                   |                     |                        |
|                              | A12F        | GAGGTGACATCATGGTGCTGT         | 56                |                     | This study             |
|                              | A689R       | ACACGTCCTAACGGTACTTGGC        |                   |                     |                        |
| <b><math>\beta^4</math></b>  | B76F        | TGCCCAGCGTGCCATCCTTCG         | 64                | MF322070 ~ MF322195 | This study             |
|                              | B1767R      | GCGGCTCTTCAGTGGTACTTGC        |                   |                     |                        |
|                              | B21F        | GGAGAAGCAGCTCATCACCG          | 60                |                     | This study             |
|                              | B1263R      | TGGTATTTGCGGGCCAGAG           |                   |                     |                        |

---

| Locus | Primer name | Sequence (5'-3')     | Annealing temp/°C  | GeneBank Accession | Reference of primers |
|-------|-------------|----------------------|--------------------|--------------------|----------------------|
|       | B665F       | GGAGCAAGAGCAAAGTCTGG | sequencing primers |                    | This study           |
|       | B815R       | GGGACAAACAGTGGGGTT   |                    |                    |                      |

---

### References

- Kvist L, Martens J, Higuchi H, Nazarenko AA, Valchuk OP et al., 2003. Evolution and genetic structure of the great tit (*Parus major*) complex. *Proc R Soc Lond B Biol Sci*, 270(1523):1447-1454.
- Sorenson MD, Ast JC, Dimcheff DE, Yuri T, Mindell DP, 1999. Primers for a PCR-based approach to mitochondrial genome sequencing in birds and other vertebrates. *Mol Phylogen Evol* 12(2), 105-114.
- Kimball RT, Braun EL, Barker FK, Bowie RCK, Braun MJ et al., 2009. A well-tested set of primers to amplify regions spread across the avian genome. *Mol Phylogen Evol* 50(3), 654-660.
- Friesen VL, Congdon B, Kidd M, Birt T, (1999) Polymerase chain reaction (PCR) primers for the amplification of five nuclear introns in vertebrates. *Mol Ecol*, 8 (12), 2147-2149.
- Zhao N, Dai C, Wang W, Zhang R, Qu Y, et al., 2012. Pleistocene climate changes shaped the divergence and demography of Asian populations of the great tit *Parus major*: Evidence from phylogeographic analysis and ecological niche models. *J Avian Biol* 43(4):297-310.

Table S3 Multi-locus summary statistics in nucleotide polymorphisms of the *P. minor* populations

| Gene                   | Population | L/bp | N   | S  | h  | $H_d$ | $\pi$  | R       | Tajima's <i>D</i> | Fu's $F_S$      |
|------------------------|------------|------|-----|----|----|-------|--------|---------|-------------------|-----------------|
| $\alpha^4$<br>(Chr 14) | All        | 660  | 132 | 17 | 20 | 0.872 | 0.0059 | 10.3    | 0.669             | -2.846          |
|                        | HB         | 660  | 46  | 5  | 6  | 0.574 | 0.0013 | 46.3    | -0.674            | -1.707          |
|                        | HA         | 660  | 40  | 11 | 9  | 0.812 | 0.0039 | 10.5    | -0.020            | -0.639          |
|                        | LA         | 660  | 46  | 9  | 13 | 0.909 | 0.0035 | 63.8    | 0.388             | -4.071          |
| $\beta^4$<br>(Chr 1B)  | All        | 453  | 108 | 14 | 14 | 0.555 | 0.0019 | 35.3    | <b>-1.820*</b>    | <b>-10.156*</b> |
|                        | HB         | 453  | 34  | 8  | 8  | 0.752 | 0.0033 | 79      | -0.682            | -2.066          |
|                        | HA         | 453  | 28  | 6  | 6  | 0.439 | 0.0012 | 153     | <b>-1.847*</b>    | -3.628          |
|                        | LA         | 453  | 46  | 7  | 8  | 0.418 | 0.0011 | > 1.e+4 | <b>-1.838*</b>    | -6.396          |
| TGFB2<br>(Chr 3)       | All        | 334  | 132 | 27 | 32 | 0.940 | 0.0087 | 7.2     | -1.246            | <b>-20.175*</b> |
|                        | HB         | 334  | 46  | 10 | 18 | 0.926 | 0.0064 | > 1.e+4 | -0.242            | -11.610         |
|                        | HA         | 334  | 40  | 21 | 15 | 0.881 | 0.0143 | 2.6     | -0.106            | -2.257          |
|                        | LA         | 334  | 46  | 15 | 24 | 0.952 | 0.0115 | 110     | 0.392             | -13.805         |
| Fib                    | All        | 281  | 132 | 14 | 17 | 0.756 | 0.0041 | > 1.e+4 | <b>-1.447*</b>    | <b>-11.191*</b> |

| Gene          | Population | L/bp | N   | S  | h  | $H_d$ | $\pi$  | R       | Tajima's $D$   | Fu's $F_S$     |
|---------------|------------|------|-----|----|----|-------|--------|---------|----------------|----------------|
| (Chr 4)       | HB         | 281  | 46  | 7  | 9  | 0.786 | 0.0049 | 89.4    | -0.392         | -2.874         |
|               | HA         | 281  | 40  | 4  | 5  | 0.658 | 0.0029 | > 1.e+4 | -0.350         | -0.918         |
|               | LA         | 281  | 46  | 10 | 11 | 0.753 | 0.0041 | > 1.e+4 | <b>-1.431*</b> | -6.127         |
| Myo           | All        | 556  | 128 | 17 | 22 | 0.844 | 0.0027 | > 1.e+4 | <b>-1.541*</b> | -16.126        |
| (Chr 1)       | HB         | 556  | 44  | 12 | 15 | 0.872 | 0.0032 | > 1.e+4 | -1.081         | -8.794         |
|               | HA         | 556  | 38  | 6  | 7  | 0.799 | 0.0024 | > 1.e+4 | -0.207         | -1.418         |
|               | LA         | 556  | 46  | 11 | 12 | 0.757 | 0.0020 | > 1.e+4 | <b>-1.652*</b> | -7.907         |
| ODC           | All        | 574  | 128 | 21 | 23 | 0.785 | 0.0030 | 26      | <b>-1.557*</b> | -15.156        |
| (Chr 3)       | HB         | 574  | 44  | 8  | 9  | 0.608 | 0.0024 | 2.1     | -0.664         | -2.826         |
|               | HA         | 574  | 40  | 10 | 9  | 0.671 | 0.0025 | 7.2     | -1.154         | -2.901         |
|               | LA         | 574  | 44  | 13 | 13 | 0.778 | 0.0027 | 37.5    | <b>-1.473*</b> | -6.984         |
| CR            | All        | 539  | 66  | 50 | 29 | 0.909 | 0.0230 | 2       | 0.482          | -2.654         |
| (mtDNA)<br>CR | HB         | 539  | 23  | 30 | 18 | 0.964 | 0.0117 | 8.3     | -0.958         | <b>-8.068*</b> |

| Gene    | Population | L/bp | N  | S  | h  | $H_d$ | $\pi$  | R       | Tajima's $D$   | Fu's $F_S$     |
|---------|------------|------|----|----|----|-------|--------|---------|----------------|----------------|
| (mtDNA) | HA         | 539  | 20 | 8  | 7  | 0.768 | 0.0029 | 10.6    | -1.050         | -2.001         |
|         | LA         | 539  | 23 | 27 | 7  | 0.735 | 0.0128 | 0.001   | -0.234         | 3.495          |
| ND2     | All        | 737  | 66 | 32 | 14 | 0.621 | 0.0128 | 0.001   | 1.287          | 3.785          |
| (mtDNA) | HB         | 737  | 23 | 13 | 10 | 0.870 | 0.0024 | 61.8    | <b>-1.727*</b> | <b>-4.599*</b> |
|         | HA         | 737  | 20 | 1  | 2  | 0.100 | 0.0001 | > 1.e+4 | -1.164         | -0.879         |
|         | LA         | 737  | 23 | 3  | 3  | 0.170 | 0.0004 | 0.001   | -1.731         | -1.305         |

Notes: Chr, position in Zebra finch chromosomes {Alev *et al.* 2009}; mtDNA, mitochondrial DNA; L, length; N, number of chromosomes; S, number of segregating sites; h, number of haplotypes;  $H_d$ , haplotype diversity;  $\pi$ , nucleotide diversity; Tajima's  $D$ , statistics of Tajima's  $D$  and Fu's  $F_S$ , statistics of Fu's  $F_S$  test (Bold\* is deviated from expected neutral equilibrium at  $P < 0.05$ ).  $\theta_w$ /bp, population mutation rate per site based on the number of segregating sites and recombination rate per gene {Watterson 1975}. R, recombination rate per gene.

## References

- Alev C, Shinmyozu K, McIntyre B, Sheng G, 2009, Genomic organization of zebra finch alpha and beta globin genes and their expression in primitive and definitive blood in comparison with globins in chicken. *Dev Genes and Evol* 219(7): 353-360.
- Watterson G, 1975. On the number of segregating sites in genetical models without recombination. *Theor Popul Biol* 7(2):256-276.

**Table S4** Heterozygosity and genotype frequencies in  $\alpha^4$ - and  $\beta^4$ -globin subunit of the *P. minor* by Hardy-Weinberg equilibrium test.

| $\alpha^4$ -globin genotypes | Population                                |     |     |     |     |     | HB            | HA            | LA            |
|------------------------------|-------------------------------------------|-----|-----|-----|-----|-----|---------------|---------------|---------------|
|                              | Haplotypic H <sub>o</sub> /H <sub>e</sub> |     |     |     |     |     | 0.435*/ 0.578 | 0.750 / 0.812 | 0.783*/ 0.909 |
|                              | Genotypic H <sub>o</sub> /H <sub>e</sub>  |     |     |     |     |     | NA            | 0.500 / 0.509 | 0.435 / 0.587 |
|                              | 22                                        | 35  | 49  | 57  | 72  | 108 |               |               |               |
| <b>1</b>                     | Asp                                       | Ala | Asn | Gly | Asn | Ala | 100% (23)     | 45.0% (9)     | —             |
|                              | .                                         | .   | .   | .   | .   | .   |               |               |               |
| <b>2</b>                     | .                                         | .   | .   | .   | .   | .   | —             | 30.0% (6)     | —             |
|                              | .                                         | .   | Ser | .   | .   | Val |               |               |               |
| <b>3</b>                     | .                                         | .   | .   | .   | .   | .   | —             | 10.0% (2)     | —             |
|                              | .                                         | .   | Ser | Ala | His | Val |               |               |               |
| <b>4</b>                     | .                                         | .   | .   | .   | .   | .   | —             | 5.0% (1)      | —             |
|                              | Glu                                       | Thr | Ser | .   | His | Val |               |               |               |
| <b>5</b>                     | .                                         | .   | Ser | .   | .   | Val | —             | 5.0% (1)      | —             |
|                              | .                                         | .   | Ser | .   | .   | Val |               |               |               |
| <b>6</b>                     | .                                         | .   | Ser | Ala | His | Val | —             | 5.0% (1)      | 8.7% (2)      |
|                              | Glu                                       | Thr | Ser | .   | His | Val |               |               |               |
| <b>7</b>                     | .                                         | .   | Ser | Ala | His | Val | —             | —             | 4.3% (1)      |
|                              | .                                         | Thr | Ser | .   | His | Val |               |               |               |
| <b>8</b>                     | Glu                                       | Thr | Ser | .   | His | Val | —             | —             | 30.4% (7)     |
|                              | Glu                                       | Thr | Ser | .   | His | Val |               |               |               |
| <b>9</b>                     | .                                         | Thr | Ser | .   | His | Val | —             | —             | 26.1% (6)     |
|                              | .                                         | Thr | Ser | .   | His | Val |               |               |               |
| <b>10</b>                    | Glu                                       | Thr | Ser | .   | His | Val | —             | —             | 26.1% (6)     |

| $\alpha^A$ -globin genotypes | Population           |           |           |           |           |            | HB         | HA         | LA        |
|------------------------------|----------------------|-----------|-----------|-----------|-----------|------------|------------|------------|-----------|
|                              | Haplotypic $H_o/H_e$ |           |           |           |           |            |            |            |           |
|                              | Genotypic $H_o/H_e$  |           |           |           |           |            |            |            |           |
|                              | <b>22</b>            | <b>35</b> | <b>49</b> | <b>57</b> | <b>72</b> | <b>108</b> |            |            |           |
|                              | .                    | Thr       | Ser       | .         | His       | Val        |            |            |           |
| <b>11</b>                    | .                    | .         | Ser       | Ala       | His       | Val        | —          | —          | 4.3% (1)  |
|                              | .                    | Thr       | Ser       | .         | His       | Val        |            |            |           |
| $\beta^A$ -globin genotypes  | Population           |           |           |           |           |            | HB         | HA         | LA        |
|                              | Haplotypic $H_o/H_e$ |           |           |           |           |            |            |            |           |
|                              | Genotypic $H_o/H_e$  |           |           |           |           |            |            |            |           |
|                              | <b>21</b>            |           |           |           |           |            |            |            |           |
| <b>1</b>                     | Thr                  |           |           |           |           |            | 23.5% (4)  | —          | —         |
|                              | .                    |           |           |           |           |            |            |            |           |
| <b>2</b>                     | Ala                  |           |           |           |           |            | —          | 7.1% (1)   | —         |
|                              | .                    |           |           |           |           |            |            |            |           |
| <b>3</b>                     | Ala                  |           |           |           |           |            | 76.5% (13) | 92.9% (13) | 100% (23) |
|                              | Ala                  |           |           |           |           |            |            |            |           |

$H_o$ , observed heterozygosity (\*  $P < 0.05$ );  $H_e$ , expected heterozygosity; the replacements mainly exist in highland populations are shown in bold; The genotypic frequencies in observed genotypes are listed following the Hardy-Weinberg equilibrium frequencies and the number of individuals are shown in parenthesis.
